# Supplementary material for: Aptamer-Functionalized Nanoparticles Mediate PD-L1 siRNA Delivery for Effective Gene Silencing in Triple-Negative Breast Cancer Cells
Source: MDPI journal article supplement (doi:10.3390/pharmaceutics14102225), 2022-10-18
Supplement: s1 [file s1]

## Supplementary Materials

**A**

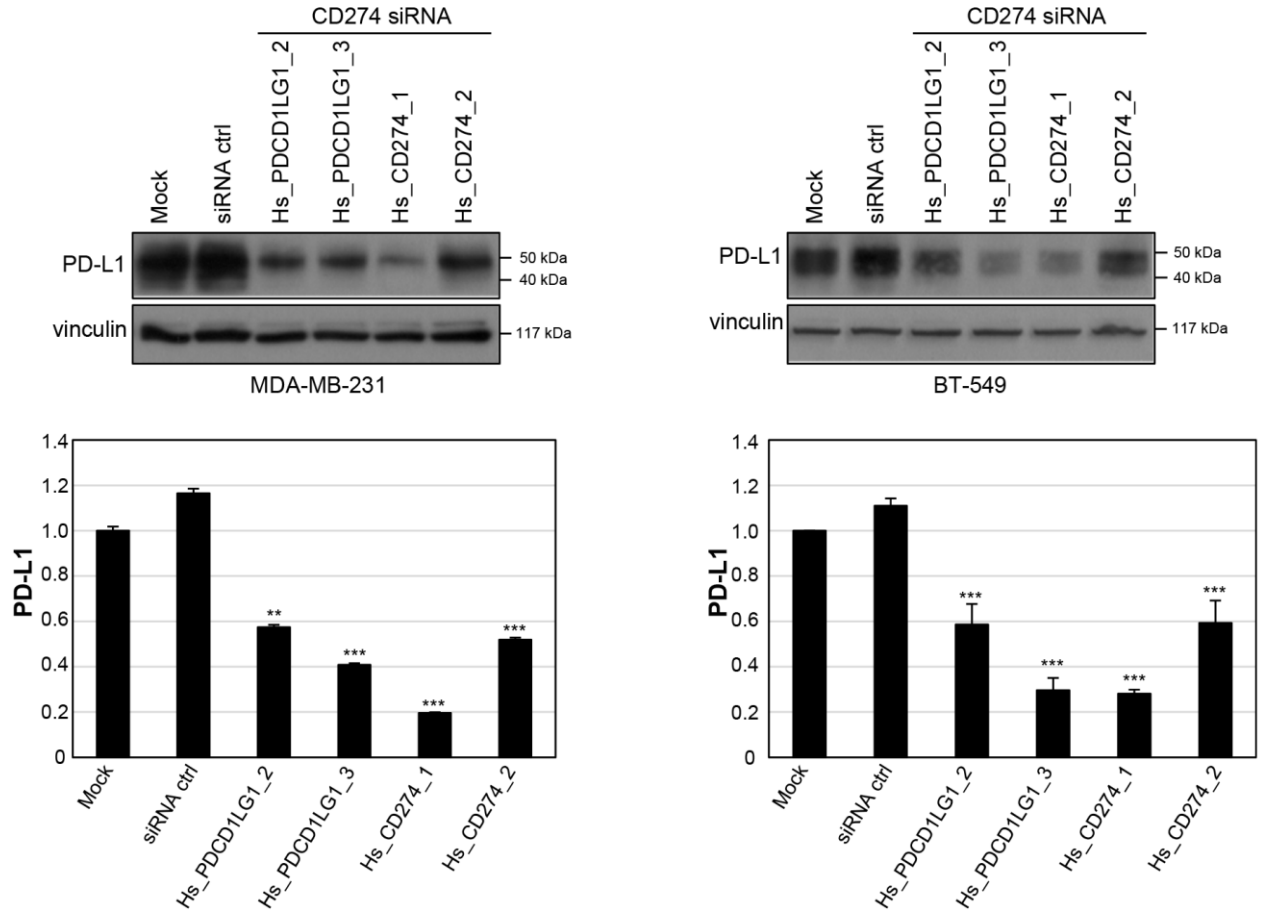

**B**

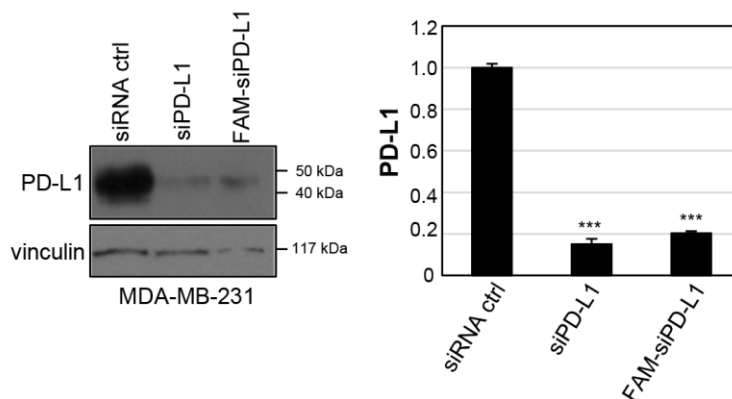

**Figure S1. PD-L1 siRNAs testing.** MDA-MB-231 or BT-549 cells were mock-treated or transfected with the indicated PD-L1 siRNAs or nonsilencing siRNA (siRNA ctrl) at 30 nM final. Hs\_CD274\_1 PD-L1 siRNA, naked (siPD-L1) or FAM-labeled (FAM-siPD-L1) were entrapped into PNPs. At 48 h post-transfection, cell lysates were prepared and immunoblotted with anti-PD-L1 antibody, as indicated. Anti-vinculin antibody was used as an immunoblot loading control. Molecular weights of indicated proteins are reported. The histograms indicate PD-L1/vinculin ratio of densitometric signals. Values are shown relative to mock-treated (A) or siRNA ctrl (B), arbitrarily set to 1. Bars depict means  $\pm$  SD of three independent experiments. \*\* $P < 0.01$ , \*\*\* $P < 0.001$ .

**A**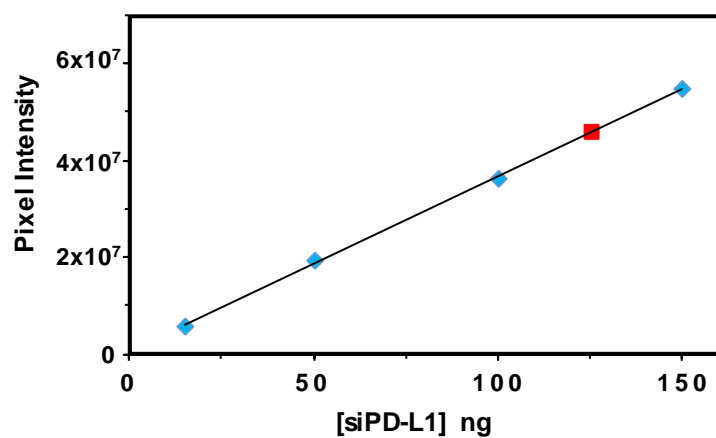**B**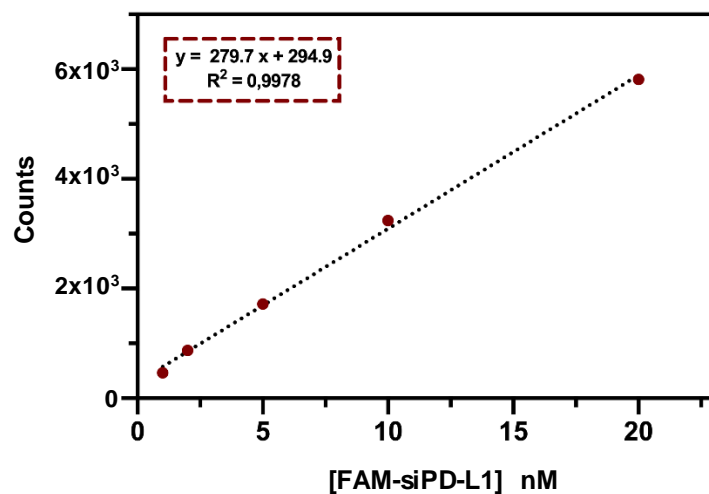

**Figure S2. Quantitative determination of PD-L1 siRNA entrapped in the nanoparticles.** (A) For determination of siPD-L1 extracted from the nanoparticles and loaded onto denaturing PAGE, the calibration line has been obtained by plotting the pixel intensity for a given siRNA band as a function of siPD-L1 amount (ng) loaded onto the gel (blue squares). Red square indicated the amount of extracted siPD-L1 in a typical nanovector formulation. (B) Indirect quantification of entrapped siRNA through fluorimetric emission measurement ( $\lambda=540$  nm) in the wastewater after sample purification. The calibration line has been obtained with the signal measured for different molar concentrations of siRNA, from 1 to 20 nM.

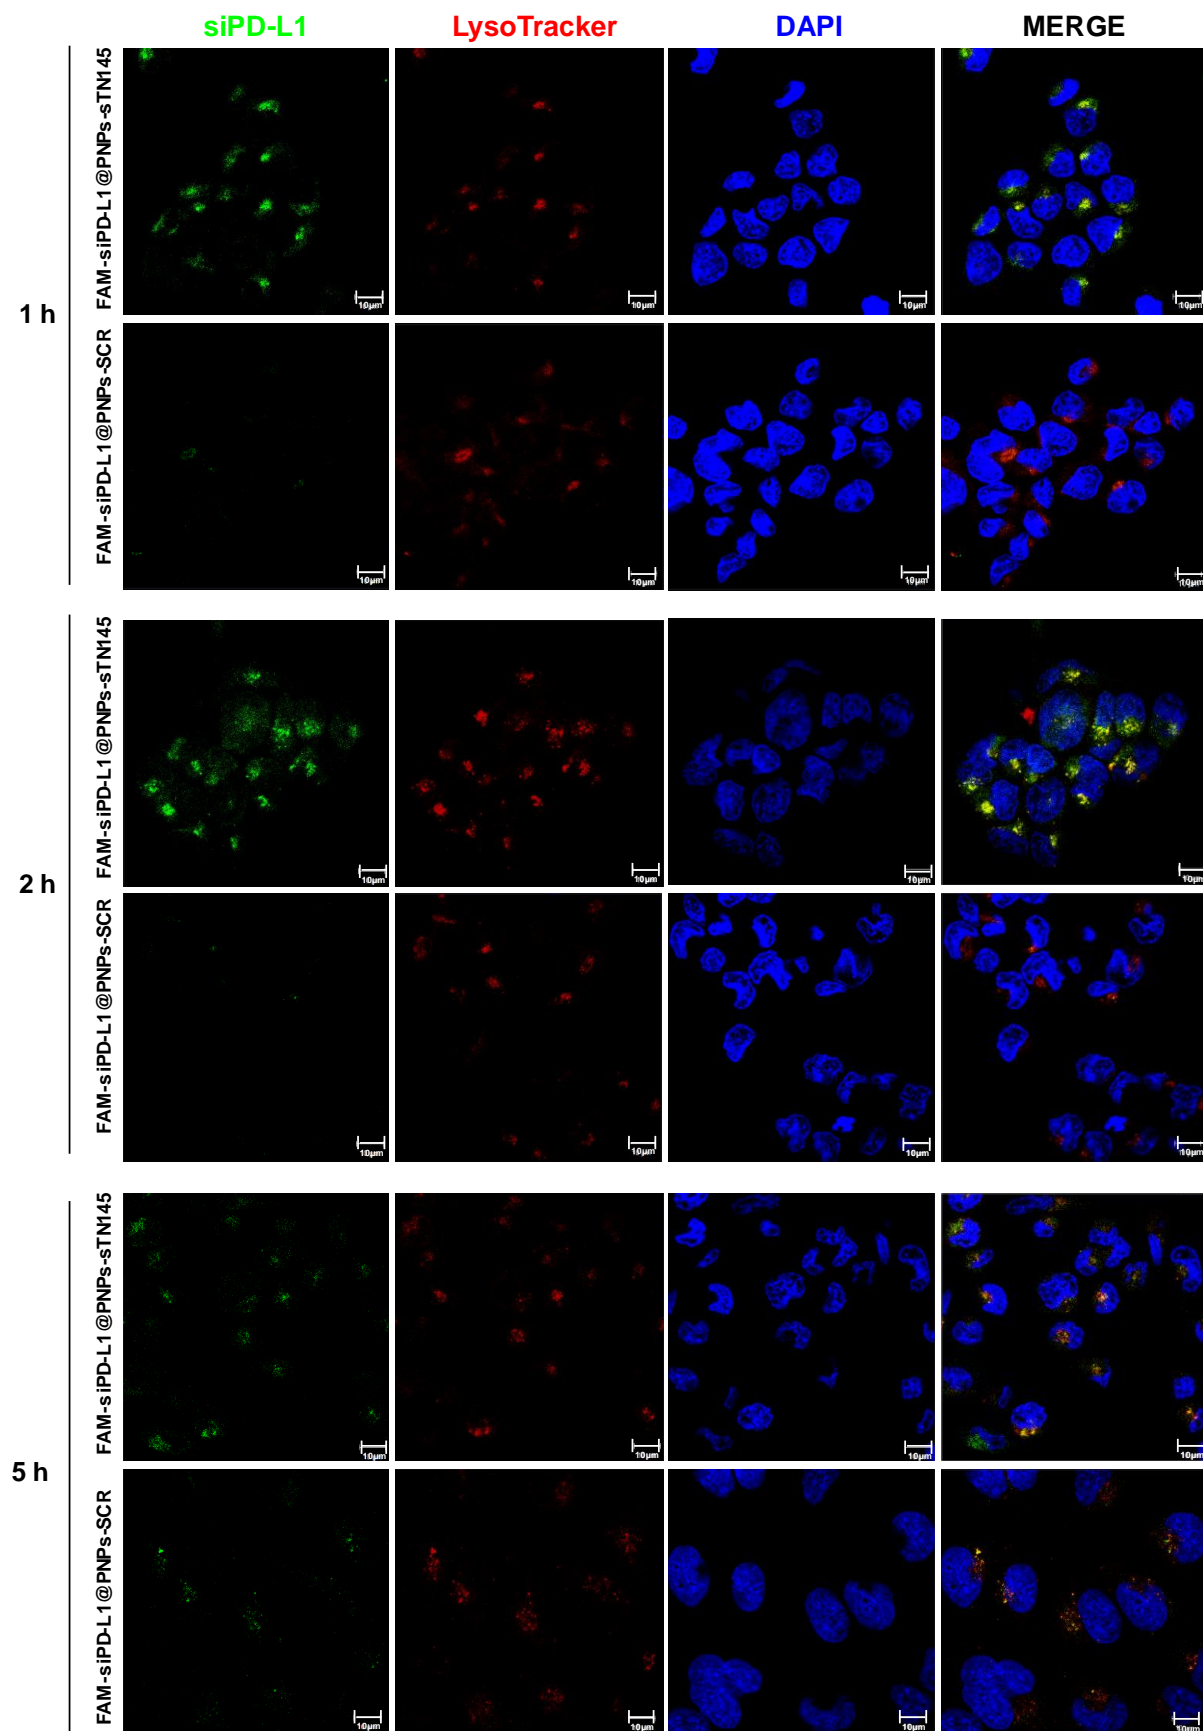

**Figure S3. Selective cell uptake and release from endosomes of FAM-siPD-L1@PNPs-sTN145.** Single-channel confocal images of representative merged images shown in Figure 4A. FAM-siPD-L1, LysoTracker, and nuclei are visualized in green, red and blue, respectively. Magnification 63 $\times$ , 1.0 $\times$  digital zoom, scale bar = 10  $\mu$ m. All digital images were captured at the same setting to allow direct comparison of staining patterns.
